# Supplementary material for: CAR-Associated Vesicular Transport of an Adenovirus in Motor Neuron Axons
Source: PubMed Central journal article supplement (PMC2677547; doi:10.1371/journal.ppat.1000442), 2009-05-22

**A**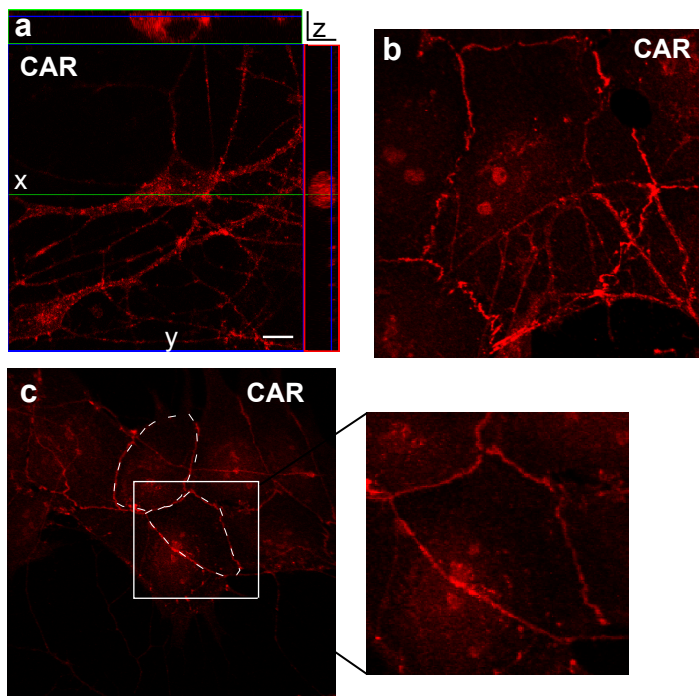**B**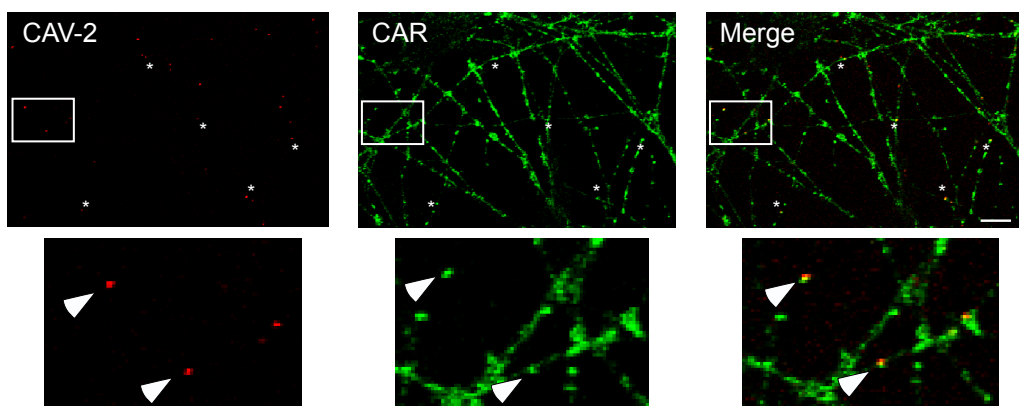**C**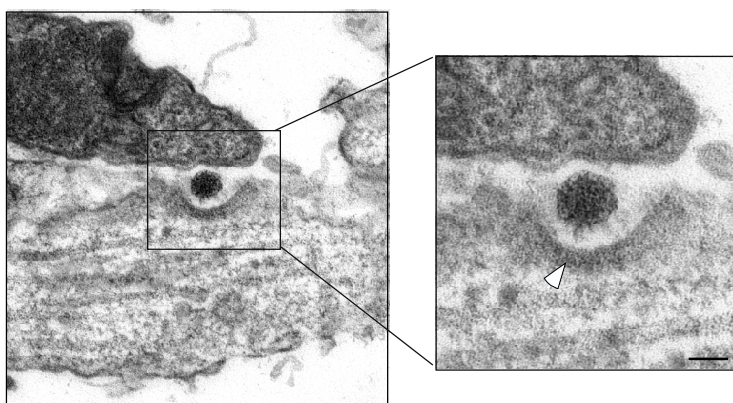**D**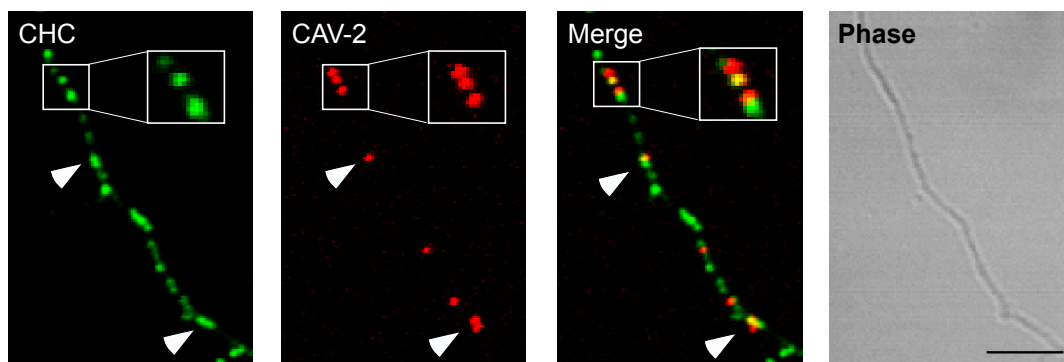

Supplement: ppat.1000442.s001.pdf [file ppat.1000442.s001.pdf]
