# Supplementary material for: CAR-Associated Vesicular Transport of an Adenovirus in Motor Neuron Axons
Source: PubMed Central journal article supplement (PMC2677547; doi:10.1371/journal.ppat.1000442), 2009-05-22
Supplement: ppat.1000442.s002.pdf [file ppat.1000442.s002.pdf]

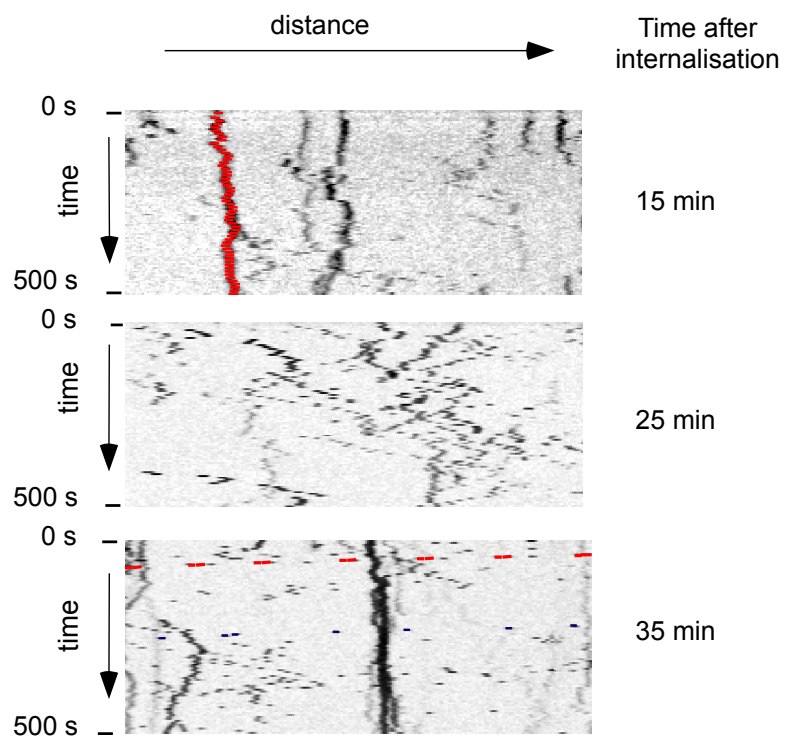

Salinas et al. Figure S2
